# Supplementary material
Source: PubMed Central journal article supplement (PMC4765924)
Supplement: NIHMS754089-supplement-ST1.pdf [file NIHMS754089-supplement-ST1.pdf]

Supplement Table 2

| CEA 1159 Rt |           |                         |                             |             |           |                                   |
|-------------|-----------|-------------------------|-----------------------------|-------------|-----------|-----------------------------------|
| Segment     | Section # | Ca Area mm <sup>2</sup> | Tissue Area mm <sup>2</sup> | Ca/Tissue % | Lumen M:T | Correlations                      |
| I           | 14        | 0.110                   | 10.820                      | 1.0%        | 100.0%    | <i>Ca Area vs. Tissue Area</i>    |
| I           | 24        | 0.078                   | 16.483                      | 0.5%        | 85.5%     | $r^2=0.8365$ ; $p=0.0015^*$       |
| I           | 38        | 4.077                   | 29.189                      | 14.0%       | 84.2%     |                                   |
| I           | 57        | 0.633                   | 15.475                      | 4.1%        | 72.8%     | <i>Ca Area vs. Lumen Area</i>     |
| B           | 69        | 2.163                   | 25.427                      | 8.5%        | 79.3%     | $r^2=0.001329$ ; $p=0.9317$       |
| C           | 99        | 4.480                   | 38.969                      | 11.5%       | 79.0%     |                                   |
| C           | 119       | 6.674                   | 40.520                      | 16.5%       | 80.6%     | <i>Tissue Area vs. Lumen Area</i> |
| C           | 138       | 0.000                   | 23.287                      | 0.0%        | 84.1%     | $r^2=0.06025$ ; $p=0.5579$        |
| Total       | 8         |                         |                             |             |           |                                   |

| CEA 1179 Lt |           |                         |                             |             |           |                                   |
|-------------|-----------|-------------------------|-----------------------------|-------------|-----------|-----------------------------------|
| Segment     | Section # | Ca Area mm <sup>2</sup> | Tissue Area mm <sup>2</sup> | Ca/Tissue % | Lumen M:T | Correlations                      |
| I           | 9         | 7.673337                | 18.731404                   | 41.0%       | 77.0%     | <i>Ca Area vs. Tissue Area</i>    |
| I           | 24        | 7.849599                | 19.619627                   | 40.0%       | 71.2%     | $r^2=0.5915$ ; $p=0.1285$         |
| B           | 34        | 9.079983                | 30.396907                   | 29.9%       | 70.7%     |                                   |
| C           | 39        | 1.762766                | 34.641256                   | 5.1%        | 77.7%     | <i>Ca Area vs. Lumen Area</i>     |
| C           | 49        | 0.008883                | 33.369245                   | 0.0%        | 77.6%     | $r^2=0.2696$ ; $p=0.3699$         |
| Total       | 5         |                         |                             |             |           |                                   |
|             |           |                         |                             |             |           | <i>Tissue Area vs. Lumen Area</i> |
|             |           |                         |                             |             |           | $r^2=0.5915$ ; $p=0.1285$         |

| CEA 1979 Rt |           |                         |                             |             |           |                                   |
|-------------|-----------|-------------------------|-----------------------------|-------------|-----------|-----------------------------------|
| Segment     | Section # | Ca Area mm <sup>2</sup> | Tissue Area mm <sup>2</sup> | Ca/Tissue % | Lumen M:T | Correlations                      |
| I           | 50        | 12.148395               | 28.383012                   | 42.8%       | 86.7%     | <i>Ca Area vs. Tissue Area</i>    |
| B           | 84        | 8.002821                | 41.848224                   | 19.1%       | 72.3%     | $r^2=0.5398$ ; $p=0.1573$         |
| B           | 89        | 16.949985               | 55.609736                   | 30.5%       | 53.0%     |                                   |
| C           | 124       | 0.023485                | 29.356979                   | 0.1%        | 76.5%     | <i>Ca Area vs. Lumen Area</i>     |
| C           | C14       | 0.246145                | 27.296839                   | 0.9%        | 84.5%     | $r^2=0.4531$ ; $p=0.213$          |
| Total       | 5         |                         |                             |             |           |                                   |
|             |           |                         |                             |             |           | <i>Tissue Area vs. Lumen Area</i> |
|             |           |                         |                             |             |           | $r^2=0.3949$ ; $p=0.2562$         |

| CEA 2463 Lt |           |                         |                             |             |           |                                   |
|-------------|-----------|-------------------------|-----------------------------|-------------|-----------|-----------------------------------|
| Segment     | Section # | Ca Area mm <sup>2</sup> | Tissue Area mm <sup>2</sup> | Ca/Tissue % | Lumen M:T | Correlations                      |
| I           | 10        | 9.873136                | 17.360066                   | 56.9%       | 70.3%     | <i>Ca Area vs. Tissue Area</i>    |
| I           | 48        | 2.90751                 | 23.67096                    | 12.3%       | 62.9%     | $r^2=0.0678$ ; $p=0.6182$         |
| I           | 64        | 5.39803                 | 33.381781                   | 16.2%       | 78.9%     |                                   |
| I           | 74        | 11.869358               | 37.359473                   | 31.8%       | 72.1%     | <i>Ca Area vs. Lumen Area</i>     |
| B           | 89        | 7.961803                | 48.141012                   | 16.5%       | 56.2%     | $r^2=0.2612$ ; $p=0.3002$         |
| C           | 114       | 3.08122                 | 26.430501                   | 11.7%       | 74.3%     |                                   |
| Total       | 6         |                         |                             |             |           |                                   |
|             |           |                         |                             |             |           | <i>Tissue Area vs. Lumen Area</i> |
|             |           |                         |                             |             |           | $r^2=0.2471$ ; $p=0.3158$         |

| CEA 2602 Rt |           |                         |                             |             |           |                                |
|-------------|-----------|-------------------------|-----------------------------|-------------|-----------|--------------------------------|
| Segment     | Section # | Ca Area mm <sup>2</sup> | Tissue Area mm <sup>2</sup> | Ca/Tissue % | Lumen M:T | Correlations                   |
| I           | 4         | 0.83370                 | 32.641725                   | 2.6%        | 73.7%     | <i>Ca Area vs. Tissue Area</i> |
| I           | 23        | 9.602911                | 56.505616                   | 17.0%       | 35.4%     | $r^2=0.6644$ ; $p=0.0481^*$    |
| I           | 26        | 10.1939                 | 43.568631                   | 23.4%       | 37.8%     |                                |

| CEA 1167 Lt |           |                         |                             |             |           |                                   |
|-------------|-----------|-------------------------|-----------------------------|-------------|-----------|-----------------------------------|
| Segment     | Section # | Ca Area mm <sup>2</sup> | Tissue Area mm <sup>2</sup> | Ca/Tissue % | Lumen M:T | Correlations                      |
| I           | 9         | 0.769754                | 8.039338                    | 9.6%        | 78.5%     | <i>Ca Area vs. Tissue Area</i>    |
| I           | 28        | 1.59438                 | 13.901601                   | 11.5%       | 51.5%     | $r^2=0.1633$ ; $p=0.3208$         |
| I           | 59        | 2.627188                | 27.936423                   | 9.4%        | 55.9%     |                                   |
| B           | 74        | 2.592818                | 28.529564                   | 9.1%        | 82.2%     | <i>Ca Area vs. Lumen Area</i>     |
| B           | 103       | 2.144296                | 42.179726                   | 5.1%        | 68.3%     | $r^2=0.0147$ ; $p=0.775$          |
| C           | 119       | 4.902496                | 25.674838                   | 19.1%       | 40.2%     |                                   |
| C           | 149       | 6.117542                | 28.613099                   | 21.4%       | 70.8%     | <i>Tissue Area vs. Lumen Area</i> |
| C           | 194       | 0                       | 20.692225                   | 0.0%        | 88.9%     | $r^2=0.0626$ ; $p=0.5501$         |
| Total       | 8         |                         |                             |             |           |                                   |

| CEA 1192 Rt |           |                         |                             |             |           |                                   |
|-------------|-----------|-------------------------|-----------------------------|-------------|-----------|-----------------------------------|
| Segment     | Section # | Ca Area mm <sup>2</sup> | Tissue Area mm <sup>2</sup> | Ca/Tissue % | Lumen M:T | Correlations                      |
| I           | 9         | 0                       | 17.853219                   | 0.0%        | 46.2%     | <i>Ca Area vs. Tissue Area</i>    |
| I           | 16        | 0                       | 12.695987                   | 0.0%        | 18.0%     | $r^2=0.5457$ ; $p=0.0363^*$       |
| I           | 22        | 3.202597                | 48.421311                   | 6.6%        | 78.7%     |                                   |
| I           | 29        | 4.808126                | 53.043743                   | 9.1%        | 76.8%     | <i>Ca Area vs. Lumen Area</i>     |
| B           | 35        | 8.913058                | 73.409461                   | 12.1%       | 60.4%     | $r^2=0.0024$ ; $p=0.908$          |
| B           | 51        | 13.228113               | 53.001116                   | 25.0%       | 39.5%     |                                   |
| C           | 70        | 6.064936                | 64.465424                   | 9.4%        | 32.2%     | <i>Tissue Area vs. Lumen Area</i> |
| C           | 94        | 4.893835                | 36.229623                   | 13.5%       | 65.4%     | $r^2=0.0413$ ; $p=0.6292$         |
| Total       | 8         |                         |                             |             |           |                                   |

| CEA 2440 Rt |           |                         |                             |             |           |                                   |
|-------------|-----------|-------------------------|-----------------------------|-------------|-----------|-----------------------------------|
| Segment     | Section # | Ca Area mm <sup>2</sup> | Tissue Area mm <sup>2</sup> | Ca/Tissue % | Lumen T:M | Correlations                      |
| I           | 4         | 0.515                   | 3.416                       | 15.1%       |           | <i>Ca Area vs. Tissue Area</i>    |
| I           | 19        | 0.032                   | 16.618                      | 0.2%        | 82.0%     | $r^2=0.2899$ ; $p=0.2124$         |
| I           | 34        | 2.673                   | 21.372                      | 12.5%       | 63.6%     |                                   |
| I           | 44        | 4.366                   | 23.929                      | 18.2%       | 91.4%     | <i>Ca Area vs. Lumen Area</i>     |
| B           | 49        | 4.406                   | 28.593                      | 15.4%       | 95.2%     | $r^2=0.0141$ ; $p=0.8229$         |
| B           | 54        | 6.229                   | 58.621                      | 10.6%       | 38.8%     |                                   |
| C           | 79        | 0.837                   | 49.665                      | 1.7%        | 61.4%     | <i>Tissue Area vs. Lumen Area</i> |
| Total       | 7         |                         |                             |             |           | $r^2=0.6887$ ; $p=0.0409^*$       |

| CEA 2486 Rt |           |                         |                             |             |           |                                   |
|-------------|-----------|-------------------------|-----------------------------|-------------|-----------|-----------------------------------|
| Segment     | Section # | Ca Area mm <sup>2</sup> | Tissue Area mm <sup>2</sup> | Ca/Tissue % | Lumen M:T | Correlations                      |
| I           | 4         | 0                       | 9.127956                    | 0.0%        | 73.6%     | <i>Ca Area vs. Tissue Area</i>    |
| I           | 9         | 0.523944                | 12.724456                   | 4.1%        | 81.6%     | $r^2=0.0449$ ; $p=0.6483$         |
| I           | 14        | 0                       | 13.705298                   | 0.0%        | 69.9%     |                                   |
| I           | 24        | 0                       | 43.32572                    | 0.0%        | 39.4%     | <i>Ca Area vs. Lumen Area</i>     |
| I           | 45        | 3.76996                 | 40.005747                   | 9.4%        | 59.9%     | $r^2=0.0896$ ; $p=0.5142$         |
| B           | 52        | 1.760736                | 43.834257                   | 4.0%        | 66.6%     |                                   |
| C           | 75        | 0                       | 64.531804                   | 0.0%        | 40.8%     | <i>Tissue Area vs. Lumen Area</i> |
| Total       | 7         |                         |                             |             |           | $r^2=0.9231$ ; $p=0.0006^*$       |

| CEA 2632 Rt |           |                         |                             |             |           |                                |
|-------------|-----------|-------------------------|-----------------------------|-------------|-----------|--------------------------------|
| Segment     | Section # | Ca Area mm <sup>2</sup> | Tissue Area mm <sup>2</sup> | Ca/Tissue % | Lumen M:T | Correlations                   |
| I           | 9         | 2.561347                | 26.636225                   | 9.6%        | 83.0%     | <i>Ca Area vs. Tissue Area</i> |
| I           | 24        | 0.00180                 | 25.985929                   | 0.01%       | 95.0%     | $r^2=0.0638$ ; $p=0.6819$      |
| I           | 39        | 8.070052                | 27.124031                   | 29.8%       | 85.2%     |                                |

|       |    |          |           |      |       |                                                                |
|-------|----|----------|-----------|------|-------|----------------------------------------------------------------|
| B     | 50 | 3.506845 | 35.403064 | 9.9% | 86.7% | <b>Ca Area vs. Lumen Area</b>                                  |
| B     | 61 | 0.01610  | 37.25224  | 0.0% | 53.3% | $r^2=0.4022$ ; $p=0.1763$                                      |
| C     | 71 | 0.355432 | 35.298049 | 1.0% | 70.8% |                                                                |
| Total | 6  |          |           |      |       | <b>Tissue Area vs. Lumen Area</b><br>$r^2=0.1908$ ; $p=0.3865$ |

|       |    |          |           |       |       |                                                                |
|-------|----|----------|-----------|-------|-------|----------------------------------------------------------------|
| B     | 49 | 9.501795 | 28.602158 | 33.2% | 89.8% | <b>Ca Area vs. Lumen Area</b>                                  |
| C     | 85 | 0        | 34.19543  | 0.0%  | 90.6% | $r^2=0.8382$ ; $p=0.0291^*$                                    |
| Total | 5  |          |           |       |       | <b>Tissue Area vs. Lumen Area</b><br>$r^2=0.0010$ ; $p=0.9604$ |

**CEA 2723 Lt**

| Segment | Section # | Ca Area mm2 | Tissue Area mm2 | Ca/Tissue % | Lumen M:T | Correlations                      |
|---------|-----------|-------------|-----------------|-------------|-----------|-----------------------------------|
| I       | 15        | 0.7414      | 24.7378         | 3.0%        | 43.8%     | <b>Ca Area vs. Tissue Area</b>    |
| I       | 28        | 6.414763    | 35.158215       | 18.2%       | 83.4%     | $r^2=0.8792$ ; $p<0.0001^*$       |
| I       | 33        | 1.814828    | 31.181654       | 5.8%        | 78.8%     |                                   |
| I       | 43        | 4.419395    | 28.055258       | 15.8%       | 69.3%     | <b>Ca Area vs. Lumen Area</b>     |
| B       | 54        | 5.166312    | 36.30245        | 14.2%       | 65.6%     | $r^2=0.0901$ ; $p=0.3993$         |
| B       | 59        | 13.587391   | 41.847262       | 32.5%       | 58.7%     |                                   |
| B       | 73        | 11.287405   | 44.536895       | 25.3%       | 39.7%     | <b>Tissue Area vs. Lumen Area</b> |
| B       | 99        | 17.54374    | 59.227814       | 29.6%       | 68.3%     | $r^2=0.0871$ ; $p=0.4079$         |
| C       | 105       | 3.935989    | 34.350717       | 11.5%       | 66.0%     |                                   |
| C       | 117       | 0           | 28.113276       | 0.0%        | 82.3%     |                                   |
| Total   | 10        |             |                 |             |           |                                   |

**CEA 2776 Lt**

| Segment | Section # | Ca Area mm2 | Tissue Area mm2 | Ca/Tissue % | Lumen M:T | Correlations                                                   |
|---------|-----------|-------------|-----------------|-------------|-----------|----------------------------------------------------------------|
| I       | 17        | 7.6291      | 26.124583       | 29.2%       | 73.6%     | <b>Ca Area vs. Tissue Area</b>                                 |
| B       | 49        | 11.79985    | 57.248146       | 20.6%       | 43.8%     | $r^2=0.0024$ ; $p=0.9377$                                      |
| B       | 58        | 12.123089   | 46.630297       | 26.0%       | 38.4%     |                                                                |
| C       | 89        | 15.225491   | 65.604671       | 23.2%       | 42.0%     | <b>Ca Area vs. Lumen Area</b>                                  |
| C       | 100       | 0.045919    | 63.174485       | 0.1%        | 54.2%     | $r^2=0.0907$ ; $p=0.6224$                                      |
| Total   | 5         |             |                 |             |           | <b>Tissue Area vs. Lumen Area</b><br>$r^2=0.0079$ ; $p=0.8870$ |

**CEA 2914 Rt**

| Segment | Section # | Ca Area mm2 | Tissue Area mm2 | Ca/Tissue % | Lumen M:T | Correlations                      |
|---------|-----------|-------------|-----------------|-------------|-----------|-----------------------------------|
| I       | 20        | 0.336126    | 22.023562       | 1.5%        | 81.5%     | <b>Ca Area vs. Tissue Area</b>    |
| I       | 27        | 0.078125    | 26.181119       | 0.3%        | 84.7%     | $r^2=0.0691$ ; $p=0.5294$         |
| I       | 30        | 0           | 26.822339       | 0.0%        | 86.6%     |                                   |
| I       | 49        | 1.229819    | 49.923484       | 2.5%        | 74.5%     | <b>Ca Area vs. Lumen Area</b>     |
| I       | 94        | 0.921171    | 64.869108       | 1.4%        | 70.4%     | $r^2=0.1503$ ; $p=0.3427$         |
| B       | 104       | 1.748761    | 66.552292       | 2.6%        | 79.6%     |                                   |
| B       | 125       | 0.133464    | 85.407295       | 0.2%        | 57.5%     | <b>Tissue Area vs. Lumen Area</b> |
| C       | 135       | 0.110482    | 74.614193       | 0.1%        | 77.0%     | $r^2=0.0130$ ; $p=0.7878$         |
| Total   | 8         |             |                 |             |           |                                   |

**CEA 2927 Rt**

| Segment | Section # | Ca Area mm2 | Tissue Area mm2 | Ca/Tissue % | Lumen M:T | Correlations                                                     |
|---------|-----------|-------------|-----------------|-------------|-----------|------------------------------------------------------------------|
| I       | 11        | 0           | 8.860182        | 0.0%        | 90.6%     | <b>Ca Area vs. Tissue Area</b>                                   |
| I       | 18        | 0.729563    | 17.260065       | 4.2%        | 74.0%     | $r^2=0.6348$ ; $p=0.2033$                                        |
| I       | 34        | 1.614315    | 53.159457       | 3.0%        | 50.5%     |                                                                  |
| B       | 50        | 1.49641     | 59.995077       | 2.5%        | 51.2%     | <b>Ca Area vs. Lumen Area</b>                                    |
| C       | 76        | 0.006128    | 28.599132       | 0.0%        | 76.2%     | $r^2=0.6863$ ; $p=0.1716$                                        |
| Total   | 5         |             |                 |             |           | <b>Tissue Area vs. Lumen Area</b><br>$r^2=0.9457$ ; $p=0.0275^*$ |

**CEA 2929 Lt**

| Segment | Section # | Ca Area mm2 | Tissue Area mm2 | Ca/Tissue % | Lumen M:T | Correlations                      |
|---------|-----------|-------------|-----------------|-------------|-----------|-----------------------------------|
| I       | 4         | 0           | 12.455136       | 0.0%        | 80.6%     | <b>Ca Area vs. Tissue Area</b>    |
| I       | 10        | 0.102171    | 11.915918       | 0.9%        | 88.2%     | $r^2=0.6152$ ; $p=0.0368^*$       |
| I       | 19        | 0           | 14.900649       | 0.0%        | 90.5%     |                                   |
| I       | 44        | 0           | 30.734211       | 0.0%        | 85.4%     | <b>Ca Area vs. Lumen Area</b>     |
| B       | 65        | 7.436084    | 41.109199       | 18.1%       | 70.7%     | $r^2=0.1169$ ; $p=0.4529$         |
| B       | 83        | 1.74526     | 29.417805       | 5.9%        | 74.4%     |                                   |
| C       | 94        | 0           | 20.971091       | 0.0%        | 90.9%     | <b>Tissue Area vs. Lumen Area</b> |
| Total   | 7         |             |                 |             |           | $r^2=0.0403$ ; $p=0.6661$         |

**CEA 2940 Rt**

| Segment | Section # | Ca Area mm2 | Tissue Area mm2 | Ca/Tissue % | Lumen M:T | Correlations                      |
|---------|-----------|-------------|-----------------|-------------|-----------|-----------------------------------|
| I       | 9         | 0           | 5.603875        | 0.0%        | 83.1%     | <b>Ca Area vs. Tissue Area</b>    |
| I       | 17        | 1.35346     | 10.307754       | 13.1%       | 78.4%     | $r^2=0.5313$ ; $p=0.0259$         |
| I       | 28        | 5.315117    | 26.923687       | 19.7%       | 37.2%     |                                   |
| B       | 36        | 4.494764    | 68.457396       | 6.6%        | 82.4%     | <b>Ca Area vs. Lumen Area</b>     |
| B       | 44        | 4.78067     | 73.170858       | 6.5%        | 65.5%     | $r^2=0.1283$ ; $p=0.344$          |
| B       | 54        | 3.075545    | 71.746737       | 4.3%        | 72.9%     |                                   |
| B       | 59        | 5.40294     | 67.079277       | 8.1%        | 63.5%     | <b>Tissue Area vs. Lumen Area</b> |
| C       | 72        | 0.672158    | 28.161769       | 2.4%        | 86.0%     | $r^2=0.0197$ ; $p=0.7190$         |
| C       | 80        | 0           | 20.887538       | 0.0%        | 88.4%     |                                   |
| Total   | 9         |             |                 |             |           |                                   |

**CEA 2952 Rt**

| Segment | Section # | Ca Area mm2 | Tissue Area mm2 | Ca/Tissue % | Lumen M:T | Correlations                   |
|---------|-----------|-------------|-----------------|-------------|-----------|--------------------------------|
| I       | 4         | 2.56549     | 18.126957       | 14.2%       | 91.0%     | <b>Ca Area vs. Tissue Area</b> |
| I       | 16        | 4.034685    | 41.261072       | 9.8%        | 44.3%     | $r^2=0.0403$ ; $p=0.703$       |
| I       | 39        | 3.03738     | 38.152249       | 8.0%        | 70.7%     |                                |
| B       | 79        | 4.538616    | 35.501437       | 12.8%       | 58.7%     | <b>Ca Area vs. Lumen Area</b>  |
| C       | 104       | 2.59078     | 35.969965       | 7.2%        | 86.9%     | $r^2=0.1888$ ; $p=0.3892$      |
| C       | 112       | 0           | 35.062721       | 0.0%        | 87.1%     |                                |

**CEA 2959 Rt**

| Segment | Section # | Ca Area mm2 | Tissue Area mm2 | Ca/Tissue % | Lumen M:T | Correlations                   |
|---------|-----------|-------------|-----------------|-------------|-----------|--------------------------------|
| I       | 4         | 3.218722    | 33.313247       | 9.7%        | 81.9%     | <b>Ca Area vs. Tissue Area</b> |
| I       | 12        | 3.766238    | 43.268499       | 8.7%        | 80.7%     | $r^2=0.2993$ ; $p=0.2038$      |
| B       | 45        | 13.935763   | 52.565238       | 26.5%       | 59.4%     |                                |
| B       | 51        | 6.299786    | 53.861088       | 11.7%       | 55.9%     | <b>Ca Area vs. Lumen Area</b>  |
| C       | 66        | 0.623833    | 47.450447       | 1.3%        | 84.3%     | $r^2=0.3312$ ; $p=0.1764$      |
| C       | 82        | 2.069257    | 44.93338        | 4.6%        | 84.7%     |                                |

|       |   |
|-------|---|
| Total | 6 |
|-------|---|

|                                   |
|-----------------------------------|
| <b>Tissue Area vs. Lumen Area</b> |
| $r^2=0.0469$ ; $p=0.6804$         |

**CEA 2997 Rt**

| Segment | Section # | Ca Area mm2 | Tissue Area mm2 | Ca/Tissue % | Lumen M:T | Correlations                   |
|---------|-----------|-------------|-----------------|-------------|-----------|--------------------------------|
| I       | 20        | 0.452361    | 26.353805       | 1.7%        | 82.7%     | <b>Ca Area vs. Tissue Area</b> |
| I       | 36        | 3.16505     | 23.818003       | 13.3%       | 79.4%     | $r^2=0.4728$ ; $p=0.1995$      |
| B       | 59        | 5.051045    | 34.523024       | 14.6%       | 57.2%     |                                |
| C       | 72        | 4.970097    | 36.747726       | 13.5%       | 72.7%     | <b>Ca Area vs. Lumen Area</b>  |
| C       | 86        | 4.01936     | 38.977272       | 10.3%       | 72.3%     | $r^2=0.3718$ ; $p=0.2749$      |
| Total   | 5         |             |                 |             |           |                                |

|                                   |
|-----------------------------------|
| <b>Tissue Area vs. Lumen Area</b> |
| $r^2=0.5784$ ; $p=0.1355$         |

|       |     |          |           |      |       |                                   |
|-------|-----|----------|-----------|------|-------|-----------------------------------|
| C     | 94  | 0        | 39.471223 | 0.0% | 86.8% | <b>Tissue Area vs. Lumen Area</b> |
| C     | 116 | 0.288489 | 22.223858 | 1.3% | 69.4% | $r^2=0.0048$ ; $p=0.8825$         |
| Total | 8   |          |           |      |       |                                   |

**CEA 2999 Lt**

| Segment | Section # | Ca Area mm2 | Tissue Area mm2 | Ca/Tissue % | Lumen M:T | Correlations                      |
|---------|-----------|-------------|-----------------|-------------|-----------|-----------------------------------|
| I       | 10        | 0           | 13.545209       | 0.0%        | 77.4%     | <b>Ca Area vs. Tissue Area</b>    |
| I       | 23        | 0.622174    | 19.871563       | 3.1%        | 76.5%     | $r^2=0.7025$ ; $p=0.0185^*$       |
| I       | 37        | 0.955138    | 27.5702         | 3.5%        | 33.5%     |                                   |
| B       | 43        | 2.445957    | 35.40885        | 6.9%        | 57.0%     | <b>Ca Area vs. Lumen Area</b>     |
| B       | 59        | 3.185139    | 47.400126       | 6.7%        | 59.4%     | $r^2=0.0344$ ; $p=0.6906$         |
| C       | 66        | 4.605129    | 49.266349       | 9.3%        | 68.2%     |                                   |
| C       | 73        | 0           | 35.115142       | 0.0%        | 82.0%     | <b>Tissue Area vs. Lumen Area</b> |
| Total   | 7         |             |                 |             |           | $r^2=0.0335$ ; $p=0.6944$         |
